# Supplementary material for: Uncertainties in fertilizer-induced emissions of soil nitrogen oxide and the associated impacts on ground-level ozone and methane
Source: Copernicus journal article supplement (doi:10.5194/egusphere-2025-1416), 2025-05-12
Supplement: Supplementary file 1 [file egusphere-2025-1416-supplement.pdf]

*Supplementary Information for*

**Uncertainties in fertilizer-induced emissions of soil nitrogen oxide and the associated impacts on ground-level ozone and methane**

Cheng Gong<sup>1\*</sup>, Yan Wang<sup>2</sup>, Hanqin Tian<sup>3,4</sup>, Sian Kou-Giesbrecht<sup>5</sup>, Nicolas Vuichard<sup>6</sup> and Sönke Zaehle<sup>1</sup>

<sup>1</sup> Max Planck Institute for Biogeochemistry, Jena, 07745, Germany

<sup>2</sup> State Key Laboratory of Subtropical Silviculture, College of Environment and Resources, College of Carbon Neutrality, Zhejiang A&F University, Hangzhou, 311300, China

<sup>3</sup> Center for Earth System Science and Global Sustainability, Schiller Institute for Integrated Science and Society, Boston College, Chestnut Hill, MA, USA

<sup>4</sup> Department of Earth and Environmental Sciences, Boston College, Chestnut Hill, MA, USA

<sup>5</sup> Department of Earth and Environmental Sciences, Dalhousie University, Halifax, Nova Scotia, Canada

<sup>6</sup> Laboratoire des Sciences du Climat et de l'Environnement, LSCE-IPSL (CEA-CNRS-UVSQ), Université Paris-Saclay, Gif-sur-Yvette, France

Including:

2 Tables;

4 Figures

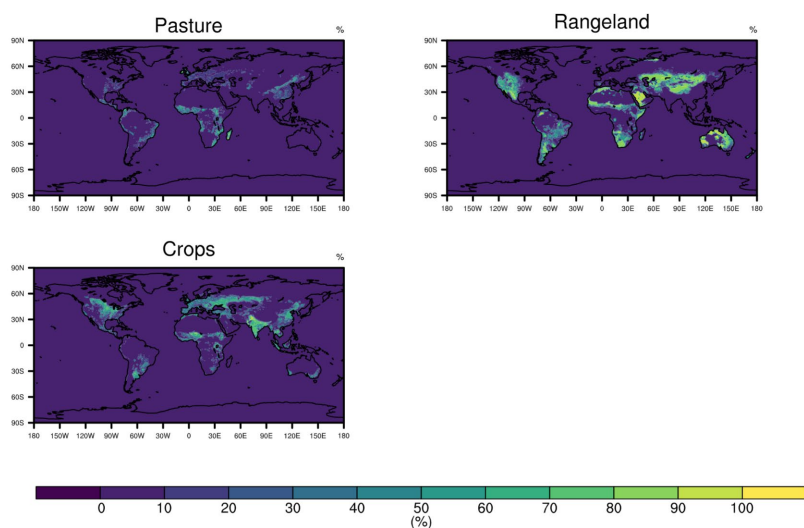

Figure S1. The global pattern of land-use categories used in this study to transform the unit of N fertilizer loadings from kg N per hectare grid area to kg N per hectare pasture, rangeland or crop. The map is from the Land-Use Harmonization (LUH2) (<https://luh.umd.edu/>)

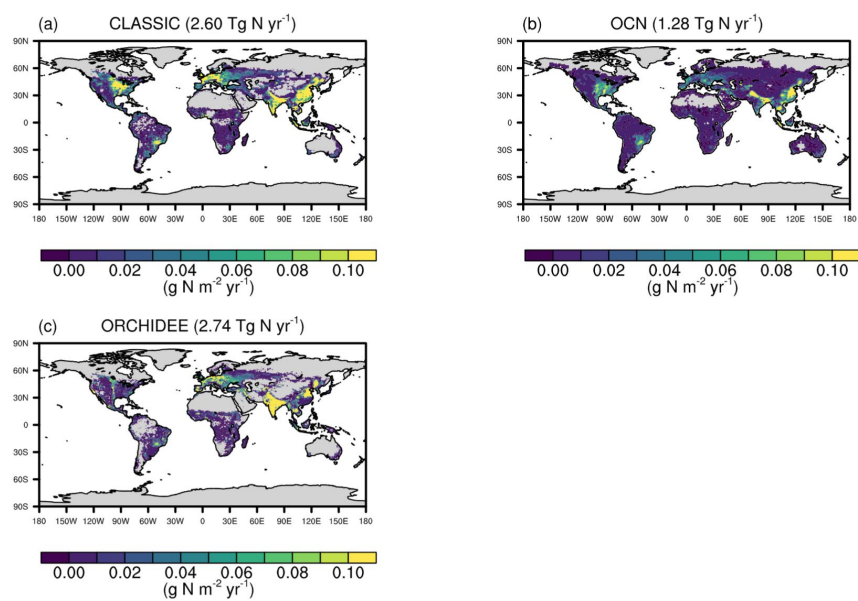

Figure S2. The global pattern of N fertilizer-induced soil  $\text{NO}_x$  emissions in 2019 simulated by three NMIP2 members. (a) the CLASSIC model; (b) the OCN model and (c) the ORCHIDEE model.

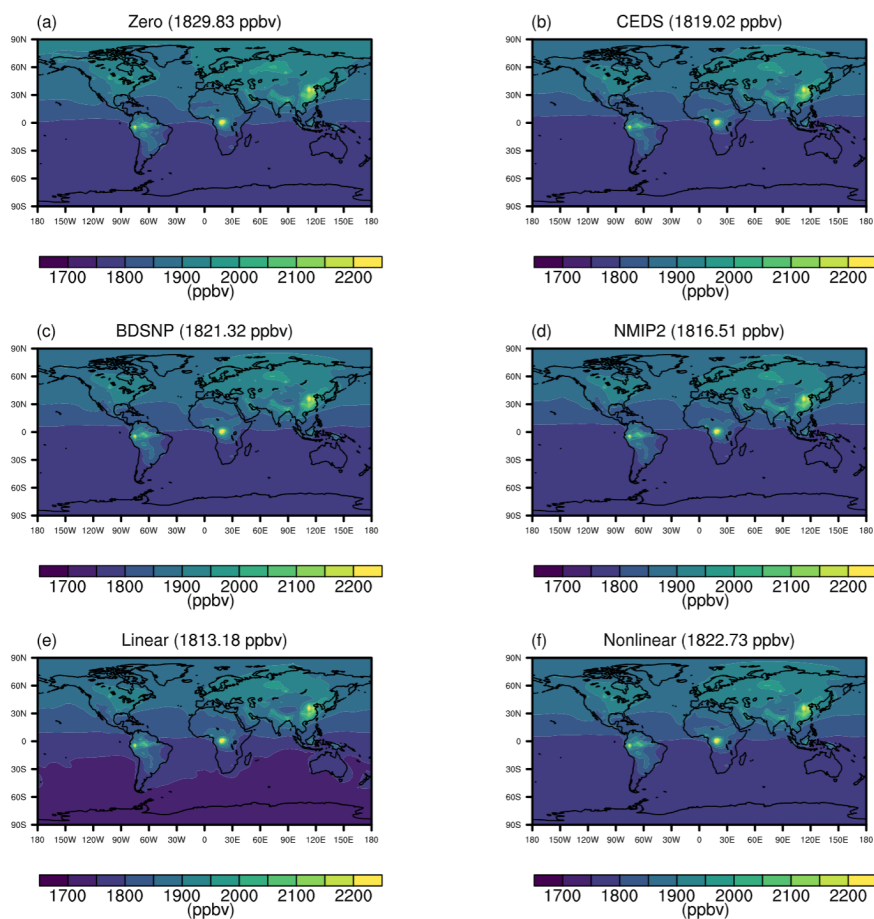

Figure S3. The simulated global surface  $\text{CH}_4$  concentrations with different sensitivity experiments. The OH concentrations of each experiment are obtained from the corresponded GEOS-Chem sensitivity experiments with full chemistry mechanisms.

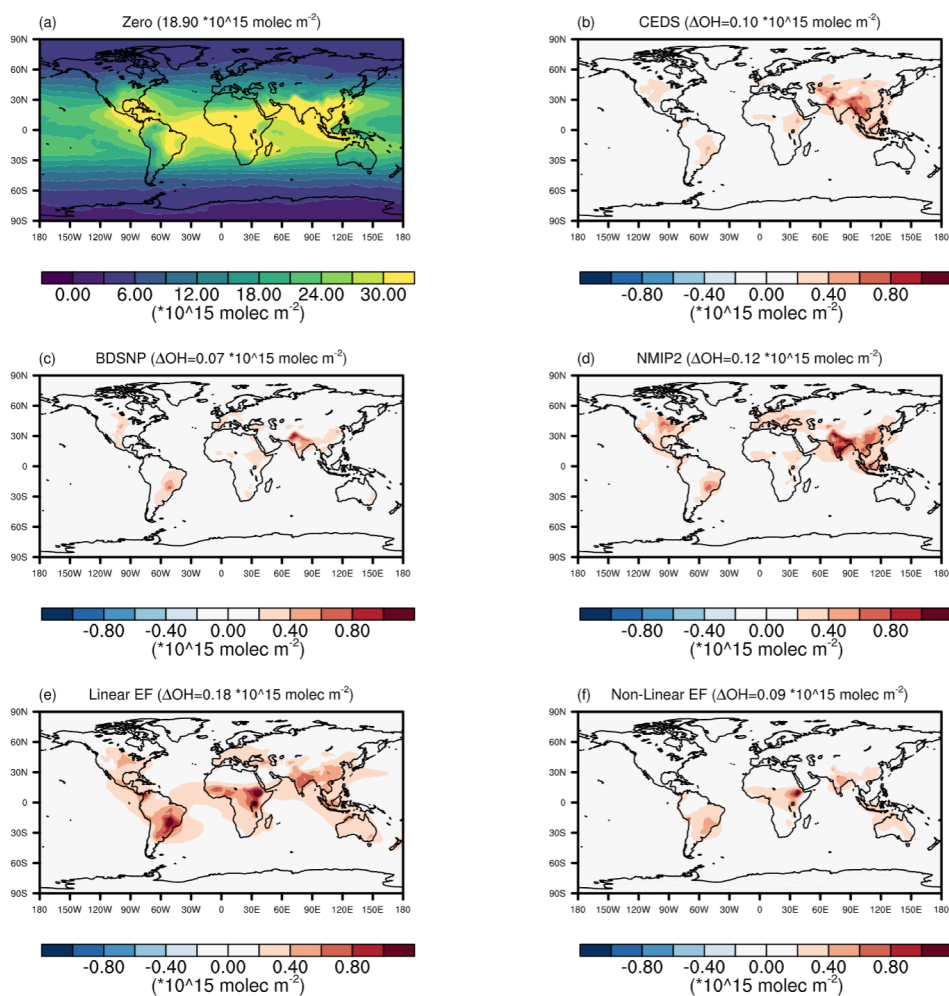

Figure S4. The annual-mean tropospheric column OH concentrations simulated by different GEOS-Chem sensitivity experiments. (a) The OH spatial pattern in the Zero simulation. (b)-(f) The differences of annual-mean tropospheric column OH between varied sensitivity experiments and the Zero experiments. The numbers in the sub-titles are the global averages of tropospheric column OH.

Table S1. NMIP2 configuration and sensitivity experiments to isolate the contributions of synthetic fertilizer and manure to the soil NO<sub>x</sub> emissions. ‘1850’ indicates that the loading of synthetic fertilizer or manure is fixed at the level of 1850, while ‘1850-2019’ indicates transient loadings based on the HaNi dataset. Other environmental forcings, e.g. the climate data, CO<sub>2</sub> concentration and land use change, are followed the historical transient data from 1850 to 2019 in each sensitivity experiment.

| Experiment name                                             | Synthetic fertilizer application | Manure application |
|-------------------------------------------------------------|----------------------------------|--------------------|
| SH1                                                         | 1850-2019                        | 1850-2019          |
| SH2                                                         | 1850                             | 1850-2019          |
| SH3                                                         | 1850-2019                        | 1850               |
| Model members used in this study: CLASSIC, OCN and ORCHIDEE |                                  |                    |

Table S2. The sources and sinks of CH<sub>4</sub> (unit: Tg CH<sub>4</sub> yr<sup>-1</sup>) applied in the GEOS-Chem model and the comparison to the IPCC AR6 budget (Canadell.J.G et al., 2021).

|                                     | This study | IPCC AR6*     |
|-------------------------------------|------------|---------------|
| <b>Sources</b>                      |            |               |
| <b>Fossil fuels</b>                 | 117.6      | 115 (114-116) |
| <b>Agriculture and waste</b>        | 238.9      | 208 (192-230) |
| Livestock                           | 121.7      | 109 (106-115) |
| Rice cultivation                    | 36.5       | 31 (25-37)    |
| Waste water and landfill            | 80.7       | 64 (55-77)    |
| <b>Biomass burning and biofuels</b> | 17.4       | 30 (22-39)    |
| Biomass burning                     | 17.4       | 17 (14-26)    |
| Biofuels                            |            | 10 (8-13)     |
| <b>Other anthropogenic sources</b>  | 24         |               |
| <b>Wetland</b>                      | 144        | 149 (102-182) |
| <b>Other natural sources</b>        | 104.6**    | 222 (143-306) |
| <b>Sum of sources</b>               | 646.5      | 727 (581-872) |
| <b>Sinks</b>                        |            |               |
| <b>Total chemical loss</b>          | 623        | 602 (496-754) |
| <b>Soil absorption</b>              | 17         | 30 (11-49)    |
| <b>Sum of sinks</b>                 | 640        | 632 (507-803) |

\*Values are from the bottom-up estimates over 2008-2017

\*\* This other natural sources in GEOS-Chem is scaled up from 13.6 to 104.6 Tg CH<sub>4</sub> yr<sup>-1</sup> to keep the balance of the total CH<sub>4</sub> budget, as the natural sources of CH<sub>4</sub> remained largest uncertainties among all sectors.

## References

Canadell.J.G, Monteiro, P. M. S., Costa, M. H., Cunha, L. C. d., Cox, P. M., Eliseev, A. V., Henson, S., Ishii, M., Jaccard, S., Koven, C., Lohila, A., Patra, P. K., Piao, S., Rogelj, J., Syampungani, S., Zaehle, S., and Zickfeld, a. K.: Global Carbon and other Biogeochemical Cycles and Feedbacks. In Climate Change 2021: The Physical Science Basis. Contribution of Working Group I to the Sixth Assessment Report of the Intergovernmental Panel on Climate Change, 673–816, <https://doi.org/10.1017/9781009157896.007>, 2021.
