# Supplementary material for: Uncertainties in fertilizer-induced emissions of soil nitrogen oxide and the associated impacts on ground-level ozone and methane
Source: Copernicus journal article supplement (doi:10.5194/egusphere-2025-1416), 2025-05-12
Supplement: Supplementary file [file egusphere-2025-1416-AC2-supplement.pdf]

## Response to Referee #2

**Title:** Uncertainties in fertilizer-induced emissions of soil nitrogen oxide and the associated impacts on ground-level ozone and methane

**MS number:** egusphere-2025-1416

**Authors:** Cheng Gong, Yan Wang, Hanqin Tian, Sian Kou-Giesbrecht, Nicolas Vuichard, and Sönke Zaehle

### *Comments:*

*The manuscript titled “Uncertainties in fertilizer-induced emissions of soil nitrogen oxide and the associated impacts on ground-level ozone and methane,” written by Gong et al., quantifies the uncertainties in soil NO<sub>x</sub> emissions induced by N fertilizer application (SNO<sub>x</sub>-Fer) using different estimation approaches and investigates the associated impacts on the simulation of global O<sub>3</sub> and CH<sub>4</sub> concentrations. Overall, this manuscript is well-structured, and the conclusion is important. However, I would like to raise two major concerns and several minor suggestions for improvement.*

### **Response:**

We appreciate reviewer’s acknowledgment on the importance of our work and the constructive comments to help further improve this work. The manuscript has been revised accordingly. Please see our point-to-point response below.

### *Major concerns:*

*I can tell by Figures 2, 3, 4, and Section 4.2 that, in general, regions with higher SNO<sub>x</sub>-Fer have higher O<sub>3</sub> enhancement. Is this an approximately linear relationship? Does this relationship vary across different sensitivity experiments and different regions? Providing a more detailed analysis of the response of the O<sub>3</sub> simulation to NO<sub>x</sub> estimations would further highlight the importance of this work. The same concern also applies to the OH/CH<sub>4</sub> simulation.*

### **Response:**

Thank you for this valuable point. The responses of O<sub>3</sub> to NO<sub>x</sub> changes could vary a lot depending on the local NO<sub>x</sub>/VOC ratios, the magnitude of NO<sub>x</sub> perturbation and metrological variations. Therefore, it is not a simply linear relationship. We agree that the analysis you suggested could help us better understand O<sub>3</sub> in which region is more sensitive to the SNO<sub>x</sub>-Fer changes, at least in the GEOS-Chem model. Here we further examined the monthly MDA8 O<sub>3</sub> changes in response to SNO<sub>x</sub>-Fer across all simulated grids in four representative hotspot regions (Fig. R1). Our results show the sensitivities of O<sub>3</sub> to SNO<sub>x</sub>-Fer changes are all positive, i.e. O<sub>3</sub> increase with enhanced SNO<sub>x</sub>-Fer, which might because of the relatively coarse resolution, but vary a lot among different regions and different SNO<sub>x</sub>-Fer estimating approaches. The Eastern U.S. in general has the strongest sensitivity, while sensitivities in the rest three regions are similar. Nevertheless, the R<sup>2</sup> of the linear regressions are not very high (0.04–0.68), indicating the strong non-linearity behind the O<sub>3</sub>-NO<sub>x</sub>-VOCs chemistry.

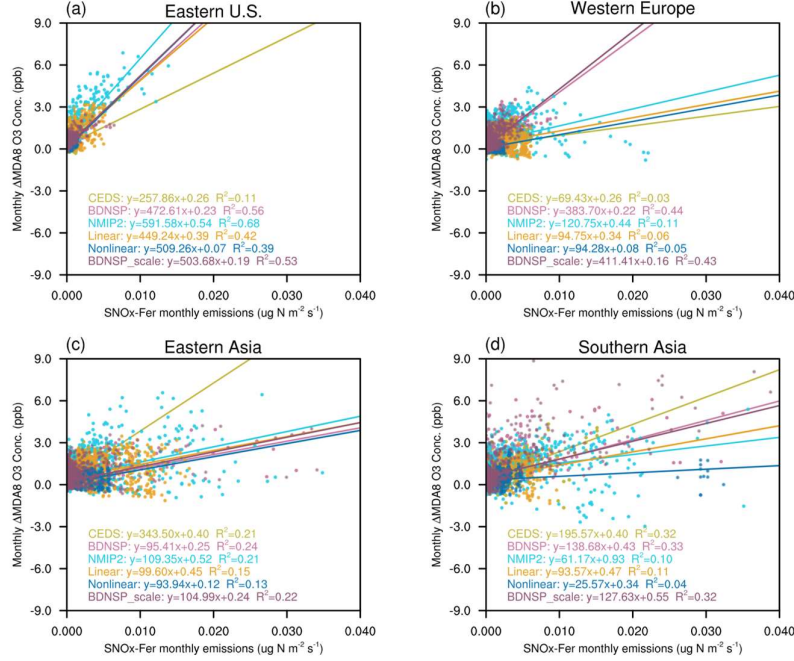

Figure R1. The sensitivity of changes in monthly MDA8 O<sub>3</sub> concentrations (ppbv) to the SNO<sub>x</sub>-Fer changes (ug N m<sup>-2</sup> s<sup>-1</sup>) among different approaches in four agricultural hotspot regions. Each dot indicates the monthly SNO<sub>x</sub>-Fer emissions and associated monthly MDA8 O<sub>3</sub> changes induced by SNO<sub>x</sub>-Fer on a simulated grid. The different SNO<sub>x</sub>-Fer estimating approaches are indicated by lines with different colors.

Similar patterns are also found in the response of OH to SNO<sub>x</sub>-Fer changes (Fig. R2). Furthermore, because CH<sub>4</sub> has much longer lifetime and thus the atmospheric transport could smooth the local CH<sub>4</sub> changes induced by varied OH, the regional CH<sub>4</sub> changes are more determined by the global signals rather than local SNO<sub>x</sub>-Fer perturbation. Nevertheless, we could still find discrepancies in the responses of ground-level CH<sub>4</sub> to SNO<sub>x</sub>-Fer among different regions and different SNO<sub>x</sub>-Fer estimates (Fig. R3), indicating the strong non-linearity in CH<sub>4</sub>-OH-NO<sub>x</sub> chemistry.

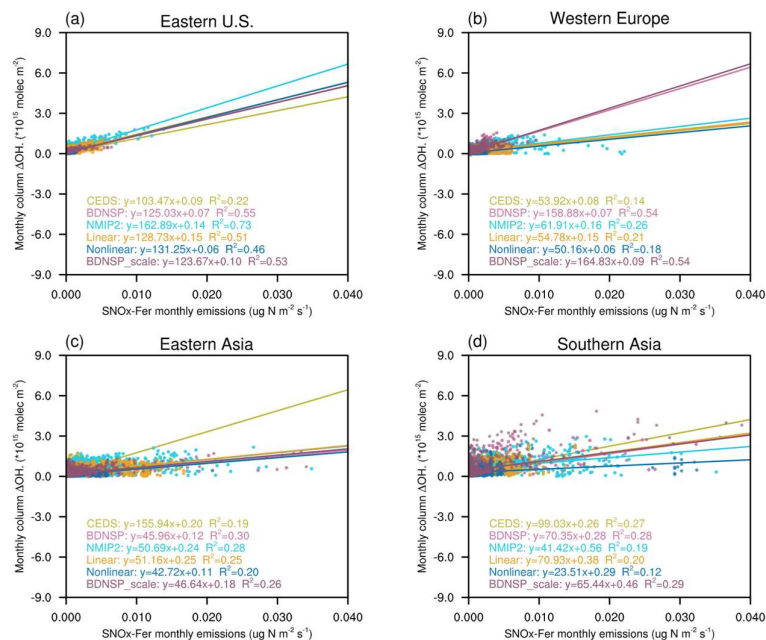

Figure R2. The sensitivity of changes in monthly column OH concentrations ( $\times 10^{15}$  molec  $m^{-2}$ ) to the SNO<sub>x</sub>-Fer changes ( $\mu g N m^{-2} s^{-1}$ ) among different approaches in four agricultural hotspot regions. Each dot indicates the monthly SNO<sub>x</sub>-Fer emissions and associated monthly OH changes induced by SNO<sub>x</sub>-Fer on a simulated grid. The different SNO<sub>x</sub>-Fer estimating approaches are indicated by lines with different colors.

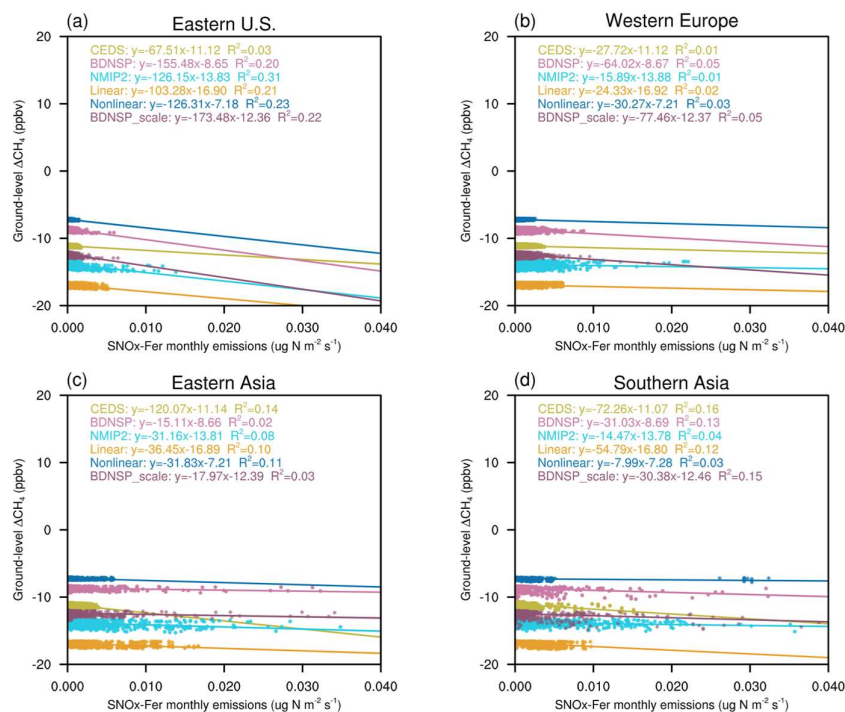

Figure R3. The sensitivity of changes in monthly ground-level CH<sub>4</sub> concentrations (ppbv) to the SNO<sub>x</sub>-Fer changes ( $\mu g N m^{-2} s^{-1}$ ) among different approaches in four agricultural hotspot regions.

Each dot indicates the monthly SNO<sub>x</sub>-Fer emissions and associated monthly CH<sub>4</sub> changes induced by SNO<sub>x</sub>-Fer on a simulated grid. The different SNO<sub>x</sub>-Fer estimating approaches are indicated by lines with different colors.

We have added discussions about this:

‘This range of responses leads to an enhancement in summertime surface MDA8 O<sub>3</sub> concentrations of 0.3 to 3.3 ppbv (0.2%-7.0%) in agricultural hotspot regions. The O<sub>3</sub> enhancement is highest in eastern U.S., while it is not only determined by the SNO<sub>x</sub>-Fer emissions, but also the diverging sensitivities of O<sub>3</sub> to NO<sub>x</sub> depending on different chemical regime in GEOS-Chem (Fig. S6). The varied SNO<sub>x</sub>-Fer estimates also lead to a reduction in global CH<sub>4</sub> concentrations of 6.7 ppbv (0.4%) to 16.6 ppbv (0.9%) ...’

*In Lines 125–129, the growing season is defined using monthly-mean 2-meter temperature and leaf area index instead of using some crop calendar datasets. While this approach is straightforward and climate-driven, it may oversimplify the actual crop phenology in diverse agricultural systems. Given that the rates of N inputs are set to zero during the non-growing season, this definition directly controls the temporal pattern of fertilizer application and thus significantly affects the estimates of fertilizer-induced NO<sub>x</sub> emissions. If crop-specific growing seasons are not distinguishable in this study, the authors should at least discuss the potential implications of this assumption in the discussion section.*

**Response:**

We acknowledge that reviewer raised an important issue when applying the EF method to assess SNO<sub>x</sub>-Fer, while the rest SNO<sub>x</sub>-Fer estimating approaches in this study are not dependent on this growing season definition. However, we are afraid that the more detailed crop calendar dataset (e.g. Minoli et al., 2019; Minoli et al., 2022) may still not be sufficient. It is not only because the consistent calendar datasets of pasture and rangeland are not available, but more importantly, the fertilizer management (e.g. how was the annual total fertilizer application distributed across months) should be the key factor that influence the seasonal cycles of SNO<sub>x</sub>-Fer. However, to our knowledge, the dataset that records the seasonal fertilizer distribution is not available yet.

The definition of growing season used in this study is not only depending on the climate, but also relies on the realistic plant greenness index (e.g. LAI). Such method is also widely used to identify the phenology of agricultural land cover (e.g. used by the Food and Agriculture Organization of the United Nations <https://agriculture.africageoportal.com/datasets/d9944082e3c6421098464b1016fbae58/about>). As this study only focus on the annual and monthly (not day-to-day) variations of SNO<sub>x</sub>-Fer, we believe that such simplified definition is sufficient to capture the dominant pattern.

We have explicitly addressed the seasonality analysis among different SNO<sub>x</sub>-Fer approaches in the revised manuscript (Sect. 4.2 and Figs. 4-5. See the response to Reviewer #1). We discuss the uncertainties induced by the definition of growing season in the revised manuscript as below:

‘In the EF approaches, the growing season is determined only by temperature and greenness in this study, which could result in a mismatch with the real crop or pasture calendar, especially ignoring the multiple-harvest crops per year. A refined calendar could further improve the prediction of SNO<sub>x</sub>-Fer seasonality.’

*Minor points:*

*Are there any top-down methods for estimating NO<sub>x</sub> emissions? If so, it would be beneficial for the authors also to describe it in the introduction, allowing for a more comprehensive review of the estimation approaches.*

**Response:**

Top-down method could more precisely assess the total NO<sub>x</sub> emissions from all sources. However, distinguishing different sources is always challenging. Although there are some studies are able to isolate soil NO<sub>x</sub> emissions by assuming the fossil-fuel emissions inventory is accurate or only applying the retrieval in pixels without significant industrial activities (e.g. Bertram et al., 2005; Lin et al., 2024), it is still very difficult to further isolate the background and fertilizer-induced soil NO<sub>x</sub> emissions.

We have added it as a discussion point in the revised manuscript:

‘... Last but not least, the top-down retrievals of NO<sub>x</sub> emissions based on satellite NO<sub>2</sub> products could also have the potential to better constrain SNO<sub>x</sub>-Fer, while gaps remained in how to precisely isolate the soil NO<sub>x</sub> emissions (Bertram et al., 2005; Lin et al., 2024) and even the fertilizer contributions from the total NO<sub>x</sub> sources. Synergizing the top-down NO<sub>x</sub> retrievals with ultra-high resolutions, where it can be assumed that the atmospheric NO<sub>x</sub> is dominantly affected by the soil sources in agricultural regions, with spatiotemporally detailed fertilizer management dataset could be one possible solution. However, more work is definitely needed to integrate such a big data in the future.’

*Section 2.2: Consider also adding one or two sentences to describe why this specific inventory is chosen.*

**Response:**

We have added the reason as:

‘We use the CEDS (Hoesly et al., 2018) for assessing the fertilizer-induced soil NO<sub>x</sub> emissions in the emission inventories. CEDS is one of the most state-of-art emission inventories that comprehensively assess the sources of dominant air pollutants from pre-industrial period to present days, which has been used as the standard emission inventory to drive CMIP6 models.’

*Figure 1: Consider merging (a) and (b) into a single figure using a secondary Y-axis for fertilizer input, which would help the reader better interpret the relationship between nitrogen inputs and SNO<sub>x</sub>-Fer across approaches.*

**Response:**

We have revised the Fig. 1 following both of your and the other reviewer’s comment as:

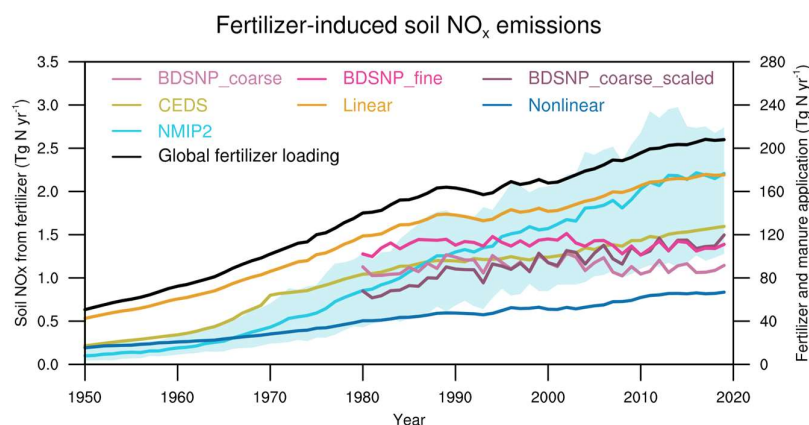

Figure 1. Global estimates of N fertilizer-induced soil NO<sub>x</sub> emissions by different approaches. The black line (right Y axis) indicates global annual-mean N synthetic fertilizer and manure inputs over 1950-2019 assessed from the HaNi dataset. The rest lines (left Y axis) indicate the N fertilizer-induced soil NO<sub>x</sub> emissions over 1950-2019 estimated by different approaches, including emission inventory (CEDS), linear and non-linear EF, the widely-used CTM parameterization with coarse resolution (2°×2.5°, BDSNP\_coarse), fine resolution (0.5°×0.625°, BDSNP\_fine) and interannually varied N availability (BNDSP\_coarse\_scaled), and the TBM ensembles (NMIP2). The light cyan shadows indicate the spread across three different TBMs in NMIP2.

*Section 4.2 and 4.3: When reporting changes in O<sub>3</sub> and CH<sub>4</sub> concentrations, consider also providing percentage changes rather than only providing the ppbv changes.*

**Response:**

The percentage changes relative to the simulated concentrations have been added accordingly.

*The HaNi dataset provided N inputs for cropland, pasture, and rangeland. Consider also providing the NO<sub>x</sub> emissions from cropland, pasture, and rangeland in the Supplementary Information.*

**Response:**

Added.



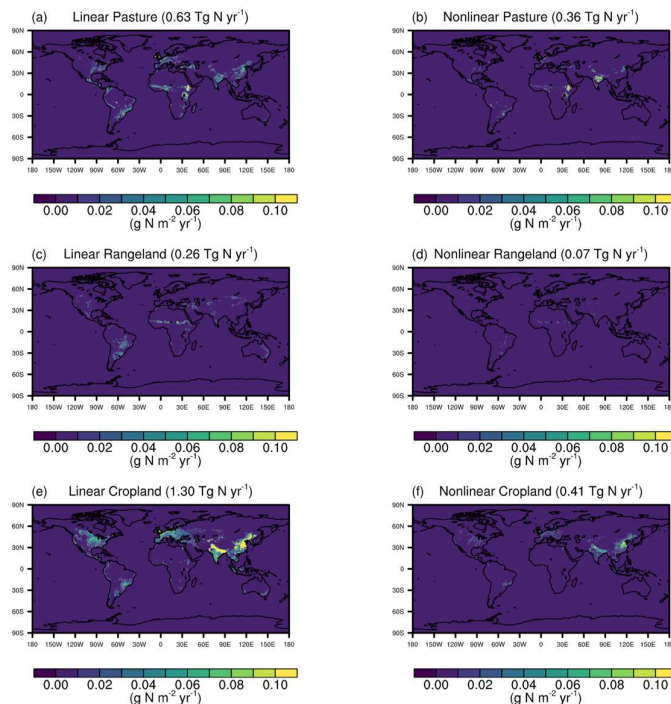

Figure S2. The spatial patterns of SNO<sub>x</sub>-Fer in pasture, rangeland and crops estimated by linear EF and non-linear EF approaches in 2019. The global total budget of each estimate is given in the sub-titles.

*Given the large differences in simulated surface O<sub>3</sub> concentrations across the different SNO<sub>x</sub>-Fer estimation methods (e.g., Fig. 3 and 4), it would be valuable to include a brief comparison with surface O<sub>3</sub> observations. While a full validation is beyond the scope of this study, even a qualitative comparison could help indicate which NO<sub>x</sub> emission estimation method may better reproduce observed O<sub>3</sub> levels in key agricultural regions.*

#### Response:

We compared our simulated summertime monthly MDA8 O<sub>3</sub> concentrations against the ground-level observations in Eastern U.S. (<https://www.epa.gov/aqs>), Western Europe (<https://ebas-data.nilu.no/Default.aspx>) and China (<https://www.cnemc.cn/en/>) (Figure S7). The site-level observational O<sub>3</sub> concentrations are averaged on each simulated grid. Note that the differences in SNO<sub>x</sub>-Fer estimates are not sufficient to explain the model systematic bias, but they are likely induced by uncertainties in other processes such as non-linear chemistry, transport and deposition.

We think it is an open question about how to properly evaluate which SNO<sub>x</sub>-Fer approaches are accurate. As we also mentioned above, the high-resolution top-down NO<sub>x</sub> retrievals could be another possible solution but there are also uncertainties in how to precisely isolate the SNO<sub>x</sub>-Fer from the total NO<sub>x</sub> emissions. We are glad to add discussions in the end to point out this question:

‘Beyond the uncertainties remaining in different SNO<sub>x</sub>-Fer estimating approaches, an important but also difficult question is how to better evaluate the performances of each methods, especially in the regional and global scales. The first-hand meta-data collected from the field experiments is actually not an independent source, as it has been used to establish both of the linear and nonlinear EF methods. More importantly, most of the field experiments are manipulation experiments with artificial fertilizer gradients, which may not fully represent the real-world spatiotemporally varied SNO<sub>x</sub>-Fer. Furthermore, we use O<sub>3</sub> data from the national or continental air quality observational networks to evaluate simulated

O<sub>3</sub> concentrations as a potential consistency check of the SNO<sub>x</sub>-Fer (Fig. S7). However, the uncertainties in SNO<sub>x</sub>-Fer are expected to be far less important relative to the uncertainties in the nonlinearity of atmospheric chemistry, emissions of BVOCs or the deposition processes, which together determined the biases between observational and simulated O<sub>3</sub> concentrations. As a result, it is inappropriate to determine the best SNO<sub>x</sub>-Fer estimate as the one with the best statistic metrics in O<sub>3</sub> simulation. Moreover, most of the sites that monitor air pollutants are located in the urban regions, where the industrial impacts are far more important than the agricultural sources. A real-time O<sub>3</sub> observational network in the cropland or pasture would be crucial to advance the understandings in SNO<sub>x</sub>-Fer and the associated impacts on air quality. Last but not least, the top-down retrievals of NO<sub>x</sub> emissions based on satellite NO<sub>2</sub> products could also have the potential to better constrain SNO<sub>x</sub>-Fer, while gaps remained in how to precisely isolate the soil NO<sub>x</sub> emissions (Bertram et al., 2005; Lin et al., 2024) and even the fertilizer contributions from the total NO<sub>x</sub> sources. Synergizing spatiotemporally detailed fertilizer management dataset with the top-down NO<sub>x</sub> retrievals with ultra-high resolutions, where the atmospheric NO<sub>x</sub> can be assumed to be dominantly affected by the soil sources in agricultural regions, could be one possible solution. However, more work is needed to integrate such a big data in the future.'

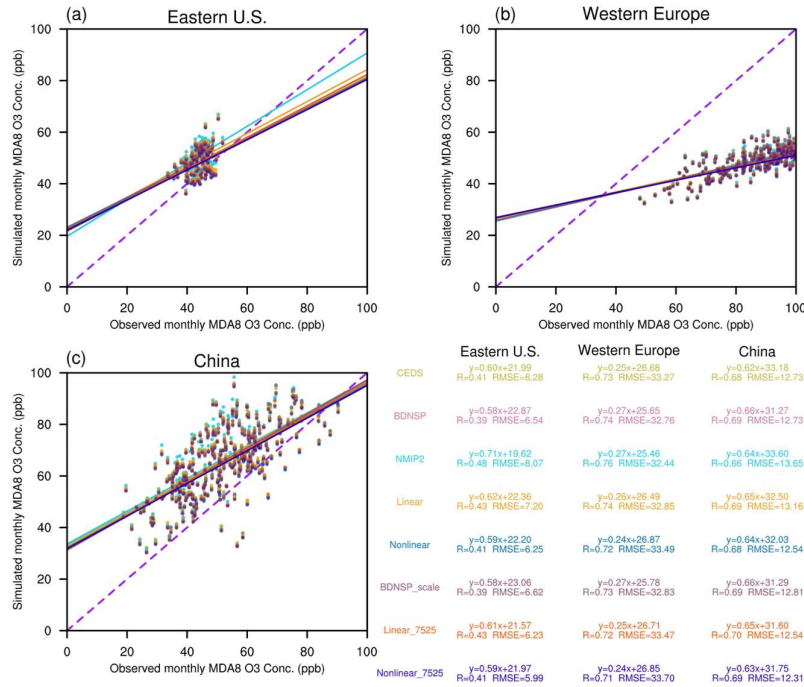

Figure S7. The comparison of monthly-averaged O<sub>3</sub> MDA8 concentrations between site-level observations and the GEOS-Chem simulations. The observational dataset in Eastern U.S., Western Europe and China are assessed via the Air Quality System (AQS, <https://www.epa.gov/aqs>), European Monitoring and Evaluation Programme (EMEP, <https://ebas-data.nilu.no/Default.aspx>) and China National Environmental Monitoring Centre (CNEMC, <https://www.cnemc.cn/en/>), respectively. Each dot indicates one simulated grid, where the observed O<sub>3</sub> concentrations are calculated by averaging all observational sites. The GEOS-Chem sensitivity experiments with different SNO<sub>x</sub>-Fer estimating approaches are indicated by different colors.



## Reference

- Bertram, T. H., Heckel, A., Richter, A., Burrows, J. P., and Cohen, R. C.: Satellite measurements of daily variations in soil NO<sub>x</sub> emissions -: art. no. L24812, *Geophysical Research Letters*, 32, 10.1029/2005gl024640, 2005.
- Hoesly, R. M., Smith, S. J., Feng, L. Y., Klimont, Z., Janssens-Maenhout, G., Pitkanen, T., Seibert, J. J., Vu, L., Andres, R. J., Bolt, R. M., Bond, T. C., Dawidowski, L., Kholod, N., Kurokawa, J., Li, M., Liu, L., Lu, Z. F., Moura, M. C. P., O'Rourke, P. R., and Zhang, Q.: Historical (1750-2014) anthropogenic emissions of reactive gases and aerosols from the Community Emissions Data System (CEDS), *Geoscientific Model Development*, 11, 369-408, 10.5194/gmd-11-369-2018, 2018.
- Lin, X. J., Ronald, V., de Laat, J., Huijnen, V., Mijling, B., Ding, J. Y., Eskes, H., Douros, J., Liu, M. Y., Zhang, X., and Liu, Z.: European Soil NO<sub>x</sub> Emissions Derived From Satellite NO<sub>2</sub> Observations, *Journal of Geophysical Research-Atmospheres*, 129, 10.1029/2024jd041492, 2024.
- Minoli, S., Egli, D. B., Rolinski, S., and Müller, C.: Modelling cropping periods of grain crops at the global scale, *Global and Planetary Change*, 174, 35-46, 10.1016/j.gloplacha.2018.12.013, 2019.
- Minoli, S., Jägermeyr, J., Asseng, S., Urfels, A., and Müller, C.: Global crop yields can be lifted by timely adaptation of growing periods to climate change, *Nature Communications*, 13, 10.1038/s41467-022-34411-5, 2022.
